# Supplementary material for: Optimized Production of Second-Generation Bioethanol from a Spent C4 Grass: Vetiver (Chrysopogon zizanioides)
Source: MDPI journal article supplement (doi:10.3390/en15249597), 2022-12-17
Supplement: s1 [file s1]

# Optimized Production of Second-Generation Bioethanol from a Spent C4 Grass: Vetiver (*Chrysopogon zizanioides*)

Sameer Neve <sup>1</sup>, Dibyendu Sarkar <sup>1,\*</sup>, Zhiming Zhang <sup>1</sup> and Rupali Datta <sup>2</sup>

<sup>1</sup> Department of Civil, Environmental, and Ocean Engineering, Stevens Institute of Technology, Hoboken, NJ 07030, USA

<sup>2</sup> Department of Biological Sciences, Michigan Technological University, Houghton, MI 49931, USA

\* Correspondence: dsarkar@stevens.edu

**Abstract:** Vetiver grass (*Chrysopogon zizanioides*) is well-known for its contaminant phytoextraction potential and its capacity to reduce soil erosion owing to its massive, dense root system. However, the shoots are not major contributors to either of these processes and are either not utilized at all or they become part of the waste stream. It is well-recognized that lignocellulosic biomass can serve as a source of raw material to produce second-generation bioethanol. This study investigated the simultaneous saccharification and fermentation (SSF) of acid-alkali pretreated vetiver (VG) shoots by *Saccharomyces cerevisiae*. Vetiver shoots were obtained from three sources: 1) Shoots from VG grown in clean potting soil, 2) Shoots from VG used for antibiotics phytoextraction from a constructed wetland setup, and 3) Shoots from VG used for lead phytoextraction during soil remediation. Bioethanol yield from the shoots from clean soil was the highest (19.58 g/L), followed by the one used for lead phytoextraction (19.50 g/L) and the one used for antibiotics phytoextraction (19.17 g/L). Bioethanol yield obtained from these three VG shoots was superior or similar to other C4 grasses used for bioethanol generation. This study successfully demonstrated that spent vetiver biomass after phytoextraction applications can be repurposed to generate high-quality bioethanol.

**Citation:** Neve, S.; Sarkar, D.; Zhang, Z.; Datta, R. Optimized Production of Second-Generation Bioethanol from a Spent C4 Grass: Vetiver (*Chrysopogon zizanioides*). *Energies* **2022**, *15*, 9597. <https://doi.org/10.3390/en15249597>

**Keywords:** vetiver shoots; lignocellulosic biomass; waste reuse; dilute acid pretreatment; bioethanol

Academic Editor: Giuliano Dragone

Received: 19 November 2022

Accepted: 14 December 2022

Published: 17 December 2022

**Publisher's Note:** MDPI stays neutral with regard to jurisdictional claims in published maps and institutional affiliations.

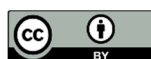

**Copyright:** © 2022 by the authors. Licensee MDPI, Basel, Switzerland. This article is an open access article distributed under the terms and conditions of the Creative Commons Attribution (CC BY) license (<https://creativecommons.org/licenses/by/4.0/>).

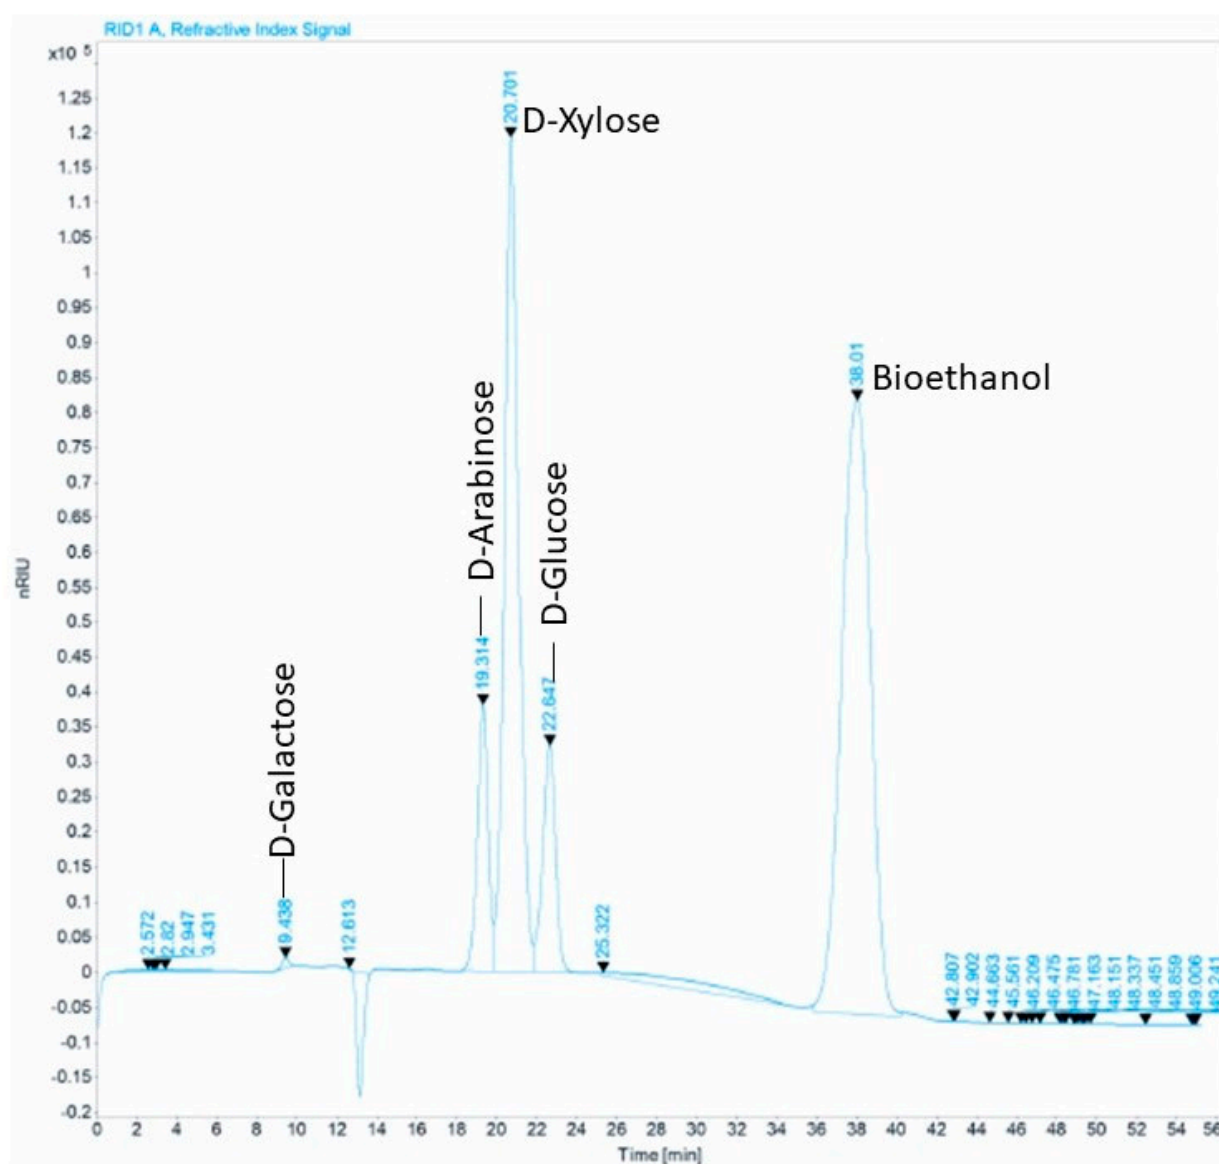

**Figure S1.** A representative HPLC chromatograph showing the monosaccharide and bioethanol peaks.
